# Supplementary material for: Identification of microRNAs in the Lyme Disease Vector Ixodes scapularis
Source: MDPI journal article supplement (doi:10.3390/ijms23105565), 2022-05-16
Supplement: s1 [file s1]

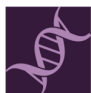

*Supplementary materials*

# Identification of microRNAs in the Lyme Disease Vector *Ixodes scapularis*

Deepak Kumar <sup>1,2</sup>, Latoyia P. Downs <sup>2</sup>, Monica Embers <sup>3</sup>, Alex Sutton Flynt <sup>1,2</sup> and Shahid Karim <sup>1,2,\*</sup>

<sup>1</sup> Center for Molecular and Cellular Biosciences, University of Southern Mississippi, Hattiesburg, MS 39406, USA; deepak.kumar@usm.edu (D.K.); alex.flynt@usm.edu (A.F.)

<sup>2</sup> School of Biological, Environmental, and Earth Sciences, University of Southern Mississippi, Hattiesburg, MS 39406, USA; latoyia.downs@usm.edu

<sup>3</sup> Division of Immunology, Tulane National Primate Research Center, Covington, LA 70433, USA; members@tulane.edu

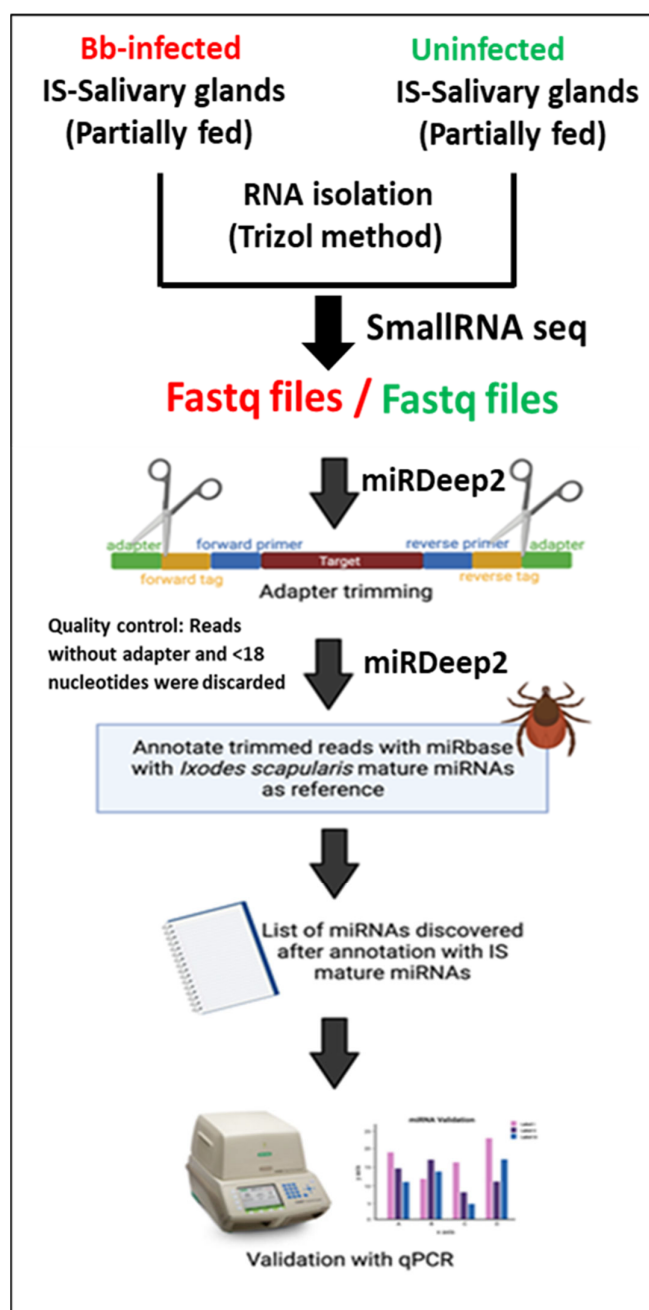

**Figure S1.** Schematic of the experimental plan and data analysis.

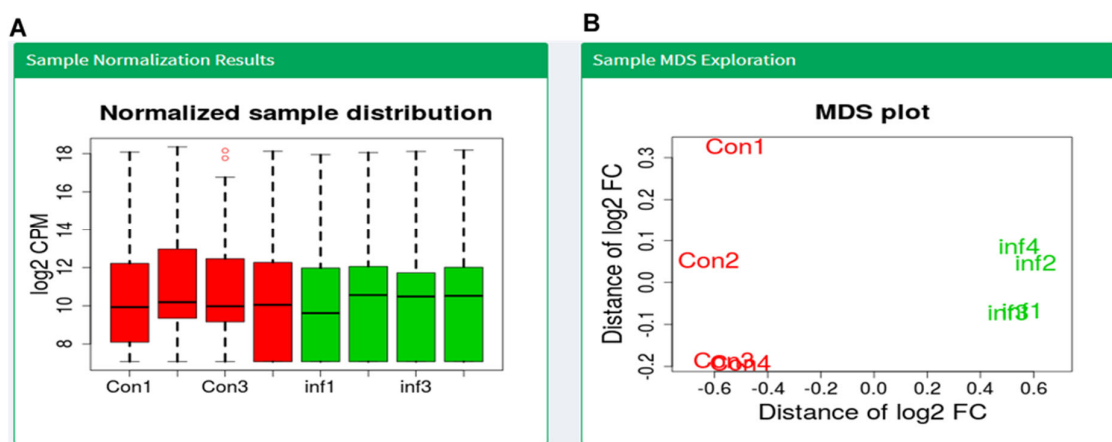

**Figure S2.** A. Normalized sample distribution for *B. burgdorferi*-infected (inf1, inf2, inf3, and inf4) and uninfected (Con1, Con2, Con3, and Con4) salivary glands. B. Multidimensional scaling (MDS) plot shows variation in differential expression among uninfected samples (Con1, Con2, Con3, and Con4), where the distance between sample labels indicates dissimilarity in log2-fold change (FC).

**Table S1.** A. MicroRNA profiling of *Ixodes scapularis* salivary glands (novel miRNAs predicted by miRDeep2).

| Provisional id                         | miRDeep2 Score | mature read count | miRbase miRNA with same seed | consensus mature sequence |
|----------------------------------------|----------------|-------------------|------------------------------|---------------------------|
| isc-miR-4968-5p                        | 1.80E+04       | 36306             | dme-miR-4968-5p              | aagcugcccaaugaagggcug     |
| NW_002532706.1_43464<br>isc-miR-92a-3p | 1.50E+04       | 29572             | dme-miR-92a-3p               | uauugcacucguccggccuuu     |
| NW_002871802.1_367<br>isc-miR-125-5p   | 1.20E+04       | 12052             | dme-miR-125-5p               | ucccugagaccuaacuuguga     |
| NW_002692816.1_23152<br>isc-miR-6-3p   | 7.60E+03       | 10940             | dme-miR-6-3p                 | uauacagccauuuugaugacc     |
| nDs_002867181.1_816                    | 2.40E+03       | 4514              |                              | gccacccacuaacugacggga     |
| nDs_002653147.1_27921                  | 2.30E+03       | 4514              |                              | gccacccacuaacugacggga     |
| nDs_002794895.1_10282                  | 2.30E+03       | 4514              |                              | gccacccacuaacugacggga     |
| nDs_002645436.1_28906                  | 1.80E+03       | 3392              |                              | gcuguuaguuuguggguuggu     |
| nDs_002860940.1_1699                   | 1.80E+03       | 3392              |                              | gcuguuaguuuguggguuggu     |
| nDs_002508325.1_46074                  | 1.80E+03       | 3279              |                              | gcuguuaguuuguggguuggu     |
| nDs_002699119.1_22404                  | 1.70E+03       | 3392              |                              | gcuguuaguuuguggguuggu     |
| NW_002767753.1_13364<br>isc-miR-958-3p | 1.70E+03       | 3446              | dme-miR-958-3p               | ugagauuacuccuccaacuucu    |
| nDs_002667887.1_26137                  | 1.70E+03       | 3392              |                              | gcuguuaguuuguggguuggu     |
| nDs_002810888.1_8213                   | 1.70E+03       | 3392              |                              | gcuguuaguuuguggguuggu     |
| nDs_002642603.1_29251                  | 1.70E+03       | 3392              |                              | gcuguuaguuuguggguuggu     |
| nDs_002815928.1_7504                   | 1.00E+03       | 2109              |                              | caagaagauagaaucaaugaga    |
| nDs_002861213.1_1662                   | 9.50E+02       | 1855              |                              | cuugggcuggaguucgcuuguu    |
| isc-miR-190-5p                         | 6.60E+02       | 621               | dme-miR-190-5p               | agauauguuugauuuuugguu     |
| nDs_002614457.1_32408                  | 6.30E+02       | 1205              |                              | cacgucgagguucagguuguu     |
| nDs_002614457.1_32404                  | 5.20E+02       | 844               |                              | uacgucgagaccucagguuga     |
| nDs_002867165.1_832                    | 5.00E+02       | 994               |                              | ucguuuucgagauucgugaaccu   |
| nDs_002728031.1_18707                  | 4.90E+02       | 952               |                              | aguggucaugucucgcacugga    |
| nDs_002621331.1_31664                  | 4.50E+02       | 812               |                              | gugugagaaaugguuggcaca     |
| nDs_002614457.1_32406                  | 4.50E+02       | 857               |                              | cacgucgagauuucagcuauug    |

|                                         |          |     |                 |                           |
|-----------------------------------------|----------|-----|-----------------|---------------------------|
| nDs_002735932.1_17756                   | 4.10E+02 | 752 |                 | ugaggucaugcucggugccuug    |
| nDs_002873519.1_126                     | 3.70E+02 | 733 |                 | auauuuuuuuuuaacaucggcu    |
| nDs_002784743.1_11607                   | 2.10E+02 | 361 |                 | cauucuugcagcgaaggguguu    |
| nDs_002620414.1_31747                   | 1.50E+02 | 213 |                 | cagugcuucugcagugcaggc     |
| nDs_002871485.1_401                     | 1.40E+02 | 280 |                 | acagaaucgagcgcuaggcgca    |
| nDs_002668420.1_26105                   | 1.10E+02 | 200 |                 | ggcacaaggcugcggauugcga    |
| nDs_002680650.1_24606                   | 1.00E+02 | 146 |                 | cucagaaaugcuaggcuauagg    |
| NW_002527183.1_43988<br>isc-miR-263b-5p | 1.00E+02 | 184 | dme-miR-263b-5p | cuuggcacugaaagaauucaca    |
| nDs_002685244.1_24008                   | 9.90E+01 | 185 |                 | cuuguuuggggcaauugggugac   |
| nDs_002814339.1_7692                    | 9.60E+01 | 185 |                 | cacgggccccagcugaacgcu     |
| nDs_002737590.1_17488                   | 9.00E+01 | 170 |                 | cagucaguggcuuugguucauc    |
| nDs_002737673.1_17464                   | 8.60E+01 | 173 |                 | guacacguucgggcuuccaccc    |
| nDs_002564688.1_39220                   | 7.40E+01 | 96  |                 | gguuuuuuucagcgugucgcu     |
| nDs_002871133.1_436                     | 7.00E+01 | 146 |                 | agccauuuuuugaagucgaca     |
| nDs_002737711.1_17449                   | 4.80E+01 | 84  |                 | agagugacgcagagaacaaauuc   |
| nDs_002675644.1_25181                   | 4.50E+01 | 84  |                 | aaaaggacagaacauguagaca    |
| nDs_002763926.1_13886                   | 3.90E+01 | 69  |                 | uguagccggauugugggacugg    |
| nDs_002531612.1_43580                   | 3.70E+01 | 53  |                 | cacugugcggaugguucaaac     |
| nDs_002722741.1_19330                   | 3.30E+01 | 75  |                 | auugaacgagaggacauaguc     |
| nDs_002567548.1_38945                   | 3.10E+01 | 52  |                 | ucaguguccgucgggaagg       |
| NW_002787101.1_11264<br>isc-miR-31b-5p  | 3.10E+01 | 26  | dme-miR-31b-5p  | aggcaagaagucuuuagggaug    |
| nDs_002754008.1_15271                   | 3.00E+01 | 70  |                 | ucacuuuacgucguaguacaag    |
| nDs_002538194.1_42559                   | 3.00E+01 | 53  |                 | uuaguacgaucgucgaaagac     |
| nDs_002801682.1_9417                    | 3.00E+01 | 54  |                 | uguagcaugcuccaagcggagg    |
| nDs_002508917.1_46002                   | 3.00E+01 | 54  |                 | uguagcaugcuccaagcggagg    |
| nDs_002568676.1_38752                   | 2.70E+01 | 48  |                 | aaggagacaaggaaacaaacacc   |
| nDs_002642725.1_29244                   | 2.60E+01 | 58  |                 | acaacccggaaucgucauggcc    |
| nDs_002670695.1_25779                   | 2.60E+01 | 40  |                 | gcuggaucguaaaacuggugcca   |
| nDs_002721909.1_19420                   | 2.40E+01 | 44  |                 | gagaggucggauagaguugcgc    |
| nDs_002548557.1_41255                   | 2.40E+01 | 40  |                 | cuagugugacugucacagugg     |
| nDs_002856865.1_2668                    | 2.40E+01 | 40  |                 | cccggcgagaaaucggcgcccg    |
| nDs_002588255.1_36295                   | 2.10E+01 | 24  |                 | agacacgcuacugacuauugcug   |
| nDs_002591771.1_35729                   | 1.80E+01 | 12  |                 | cccgguaaggacugcgcauguc    |
| NW_002637235.1_29734<br>isc-miR-4987-5p | 1.80E+01 | 20  | dme-miR-4987-5p | augcaacagaggcgagauagagacg |
| nDs_002730915.1_18372                   | 1.80E+01 | 21  |                 | gagggaagaaaacgcgaaaggac   |
| nDs_002527216.1_43980                   | 1.70E+01 | 26  |                 | aggugaauagaauacccagucgaug |
| nDs_002829027.1_5932                    | 1.60E+01 | 15  |                 | acgaaaucccgcggaucgcauug   |
| nDs_002741178.1_17075                   | 1.60E+01 | 27  |                 | uugggcuuuuaacaucaugagc    |
| nDs_002718594.1_19992                   | 1.50E+01 | 25  |                 | ucacaggacgugcaacggugcu    |
| nDs_002718594.1_19994                   | 1.50E+01 | 25  |                 | ucacaggacgugcaacggugcu    |
| NW_002681830.1_24464<br>isc-bantam-3p   | 1.40E+01 | 17  | dme-bantam-3p   | cgagaucauacgucgguggugg    |
| nDs_002515969.1_45216                   | 1.40E+01 | 17  |                 | acaauugaaguggaucccgaau    |
| nDs_002770056.1_13170                   | 1.40E+01 | 24  |                 | aacgaaucgaagguaaagugc     |
| nDs_002635366.1_29915                   | 1.30E+01 | 36  |                 | cuugugaugcucucguuugacc    |
| nDs_002745696.1_16495                   | 1.20E+01 | 16  |                 | uccgagggaaguguccugacaga   |
| nDs_002633080.1_30207                   | 1.10E+01 | 17  |                 | uauuccuuccuuuuguccgguc    |
| nDs_002862093.1_1546                    | 1.00E+01 | 18  |                 | cuauuggacgaaaaggauagcu    |
| nDs_002770523.1_13144                   | 8.5      | 11  |                 | ugaagaucccaacuuggccucg    |
| nDs_002637837.1_29679                   | 8        | 10  |                 | aaagaaauacggacgacaggag    |
| NW_002716687.1_20192<br>isc-miR-5-5p    | 5.7      | 209 | dme-miR-5-5p    | caaggaaccgacgaucgagugu    |

|                                         |     |      |                 |                          |
|-----------------------------------------|-----|------|-----------------|--------------------------|
| NW_002522525.1_44526<br>isc-miR-1007-5p | 5.6 | 30   | dme-miR-1007-5p | ucaguguuuggcuggaacccg    |
| NW_002784743.1_11604<br>isc-miR-277-3p  | 5.4 | 1487 | dme-miR-277-3p  | uaaaugcauuauucuggaug     |
| NW_002788893.1_11074<br>isc-miR-4957-3p | 5.3 | 52   | dme-miR-4957-3p | ucagcugcgugaacgcggcgcc   |
| NW_002799140.1_9764<br>isc-miR-2a-1-5p  | 4.5 | 101  | dme-miR-2a-1-5p | uucucaaauguccgccacucg    |
| nDs_002745459.1_16501                   | 2.7 | 25   |                 | accccgggguggucacgugac    |
| nDs_002813294.1_7883                    | 2.5 | 19   |                 | acggagcgacugaacaagaca    |
| nDs_002829114.1_5911                    | 2.4 | 19   |                 | agagaaaaagacagguagaacg   |
| nDs_002759900.1_14325                   | 2.4 | 95   |                 | uugccgcccugcuucauggaugg  |
| nDs_002815075.1_7597                    | 2.4 | 98   |                 | uugccgcccugcuucauggaugg  |
| nDs_002513235.1_45498                   | 2.3 | 26   |                 | ccucgguuuucggcuggcacucg  |
| nDs_002676299.1_25117                   | 2.3 | 22   |                 | ccaccgguuacgcucugcgcc    |
| nDs_002700913.1_22252                   | 2.3 | 123  |                 | gggacgaaacagacgacacagc   |
| nDs_002684507.1_24073                   | 2.3 | 258  |                 | caggcgggagaacaauuccu     |
| nDs_002756339.1_14956                   | 2.3 | 13   |                 | caagucgcggcugcacggcgcc   |
| nDs_002774760.1_12785                   | 2.3 | 12   |                 | cuucucucugcugccguggcc    |
| nDs_002696292.1_22736                   | 2.3 | 39   |                 | cugccucgcgugcugcuccgu    |
| nDs_002550131.1_40913                   | 2.2 | 19   |                 | cgccucagcuguuucugucc     |
| nDs_002542368.1_42013                   | 2.2 | 18   |                 | cacgucacagcugccgcucaag   |
| nDs_002586787.1_36439                   | 2.2 | 37   |                 | uuggacgaaaaaagagccgacu   |
| nDs_002607638.1_33547                   | 2.2 | 17   |                 | cuagccaaucgugggcgugggc   |
| nDs_002836532.1_4888                    | 2.2 | 22   |                 | ccaccgguuacgcucugcgcc    |
| nDs_002597262.1_35126                   | 2.1 | 11   |                 | cgggaucucggaggccaugaa    |
| nDs_002662116.1_26803                   | 2.1 | 21   |                 | caggauccugacgucgugggcaca |
| nDs_002636820.1_29767                   | 2.1 | 7545 |                 | caaggcaugaacaugaucuca    |
| nDs_002799981.1_9646                    | 2.1 | 24   |                 | uccguccguuccguccucuc     |
| nDs_002612646.1_32606                   | 2.1 | 7545 |                 | caaggcaugaacaugaucuca    |
| nDs_002629651.1_30593                   | 2.1 | 819  |                 | cuucguagucggauuauagacu   |
| nDs_002601819.1_34393                   | 2.1 | 32   |                 | ucgaccgcucgccacggcugg    |
| nDs_002540798.1_42197                   | 2.1 | 20   |                 | caugucacugcugcccgcaag    |
| nDs_002654127.1_27778                   | 2   | 200  |                 | uuuccgcugcugcuuguaug     |
| nDs_002860687.1_1738                    | 2   | 15   |                 | gcagauucagguuagugauc     |
| nDs_002665175.1_26443                   | 2   | 217  |                 | aacuucgugcugcaggagcccu   |
| nDs_002751908.1_15689                   | 2   | 49   |                 | uaauuggucuuugugagucuu    |
| nDs_002543222.1_41886                   | 2   | 149  |                 | gccggugucgaucuugaaguuc   |
| nDs_002569324.1_38643                   | 2   | 22   |                 | ccaccgguuacgcucugcgcc    |
| nDs_002590536.1_35849                   | 2   | 22   |                 | uucgguuuguccgcuugccu     |
| nDs_002601819.1_34394                   | 2   | 32   |                 | ucgaccgcucgccacggcugg    |
| nDs_002792777.1_10524                   | 2   | 15   |                 | ugagaucucggagucgugcgcc   |
| nDs_002714141.1_20473                   | 2   | 83   |                 | ggcuucguagucggauuauaga   |
| nDs_002744939.1_16574                   | 1.9 | 829  |                 | cuucgaaucggauuauagacu    |
| nDs_002533105.1_43443                   | 1.9 | 7545 |                 | caaggcaugaacaugaucuca    |
| nDs_002753934.1_15280                   | 1.9 | 1842 |                 | cauccgguccuaagaagucgaa   |
| nDs_002692659.1_23173                   | 1.9 | 11   |                 | cugccgaaguagcgucugcucu   |
| nDs_002733141.1_18085                   | 1.9 | 7545 |                 | caaggcaugaacaugaucuca    |
| nDs_002816672.1_7394                    | 1.9 | 200  |                 | uuuccgcugcugcuuguaug     |
| nDs_002738551.1_17311                   | 1.9 | 77   |                 | cgcgcggacgcugugacgcagc   |
| nDs_002523780.1_44319                   | 1.9 | 7545 |                 | caaggcaugaacaugaucuca    |
| nDs_002828015.1_6065                    | 1.9 | 2093 |                 | ccaggauuugaacucuggccu    |
| nDs_002829464.1_5811                    | 1.9 | 7545 |                 | caaggcaugaacaugaucuca    |
| nDs_002545827.1_41513                   | 1.9 | 44   |                 | aagggaaccgugcgagagcugcu  |

|                                        |     |      |                |                            |
|----------------------------------------|-----|------|----------------|----------------------------|
| nDs_002692659.1_23171                  | 1.8 | 11   |                | cugccgaaguagcgucugcucu     |
| nDs_002661855.1_26902                  | 1.8 | 70   |                | gacauaguaaggauugacg        |
| nDs_002765967.1_13675                  | 1.8 | 17   |                | uauuccuuccuuuuguccgguc     |
| nDs_002574390.1_37989                  | 1.8 | 259  |                | uuccgccgucgaucguagaug      |
| nDs_002550131.1_40914                  | 1.8 | 19   |                | cgccucagcuguuucugcucc      |
| nDs_002871802.1_364                    | 1.8 | 103  |                | agggccugagaaucaaccugg      |
| nDs_002673151.1_25529                  | 1.8 | 29   |                | gcgacacagagacgaagacug      |
| nDs_002809300.1_8415                   | 1.8 | 1873 |                | cauccgguccuaagaagucgaa     |
| nDs_002738154.1_17397                  | 1.8 | 35   |                | cggaggauaguggguggaccug     |
| nDs_002532161.1_43535                  | 1.8 | 1943 |                | cauccgguccuaagaagucgaa     |
| nDs_002798374.1_9856                   | 1.8 | 271  |                | uucgagcgcuaaggacagagccg    |
| nDs_002724962.1_19022                  | 1.8 | 339  |                | agaaagugcgucugcgcgcg       |
| nDs_002692659.1_23176                  | 1.8 | 108  |                | acuaaaaaaacaggacaagu       |
| nDs_002744911.1_16578                  | 1.8 | 11   |                | auucggacaucccgaggacguc     |
| nDs_002545470.1_41626                  | 1.8 | 11   |                | auucggacaucccgaggacguc     |
| nDs_002785931.1_11413                  | 1.8 | 7545 |                | caaggcaaugaacaugaucuca     |
| nDs_002685244.1_24007                  | 1.8 | 185  |                | cuuguuugggcaauugggugac     |
| nDs_002784743.1_11583                  | 1.7 | 12   |                | aggacgauugagcucgac         |
| nDs_002587969.1_36333                  | 1.7 | 53   |                | cacgauugccaacuguaugcu      |
| nDs_002661304.1_26957                  | 1.7 | 39   |                | aguccgucgucgaucugccu       |
| nDs_002707270.1_21452                  | 1.7 | 26   |                | uucgcguucggacgugucgaa      |
| nDs_002549652.1_41058                  | 1.7 | 1892 |                | caugccguggcuuagacca        |
| nDs_002737099.1_17587                  | 1.7 | 379  |                | uuuggcaggcuuagaauacacuc    |
| nDs_002511156.1_45736                  | 1.7 | 95   |                | uuugcaccgucgucguagaug      |
| nDs_002608667.1_33381                  | 1.7 | 30   |                | auaggacuugauguuuuaggcucagu |
| nDs_002699570.1_22364                  | 1.7 | 108  |                | acuaaaaaaacaggacaagu       |
| nDs_002537755.1_42809                  | 1.6 | 53   |                | acaccgguaauuuaaggguuauucug |
| nDs_002553320.1_40621                  | 1.6 | 11   |                | auucggacaucccgaggacguc     |
| nDs_002581904.1_37014                  | 1.6 | 12   |                | gccauagcguaacagagugacg     |
| nDs_002541749.1_42092                  | 1.6 | 1943 |                | cauccgguccuaagaagucgaa     |
| nDs_002509761.1_45913                  | 1.6 | 74   |                | gacuucagguccaucuggacg      |
| nDs_002542368.1_42015                  | 1.6 | 18   |                | cacgucacagcguccgucaag      |
| nDs_002650258.1_28240                  | 1.6 | 56   |                | gcuguuaguuuugugggauggu     |
| nDs_002745745.1_16473                  | 1.6 | 259  |                | uuccgccgucgaucguagaug      |
| nDs_002692816.1_23143                  | 1.6 | 105  |                | uuucacaguccuuugacgg        |
| nDs_002664372.1_26487                  | 1.6 | 18   |                | acuaccgaccgugugugaccg      |
| nDs_002677543.1_24907                  | 1.6 | 1862 |                | cauccgguccuaagaagucgaa     |
| nDs_002505804.1_46391                  | 1.6 | 74   |                | gacuucagguccaucuggacg      |
| nDs_002855841.1_2713                   | 1.6 | 137  |                | acugugauugaacugaacgaca     |
| nDs_002592079.1_35704                  | 1.6 | 14   |                | gaguagaaugccugaauuguugcu   |
| nDs_002653831.1_27809                  | 1.6 | 114  |                | aaggcgaacgcugaccugggcc     |
| nDs_002630829.1_30421                  | 1.5 | 17   |                | cgacgaauuucuggagaucgca     |
| nDs_002535729.1_43080                  | 1.5 | 331  |                | cuucgcucugcuuaaguggacc     |
| nDs_002590762.1_35829                  | 1.5 | 95   |                | uugccgccgucguucauggaugg    |
| nDs_002617786.1_32035                  | 1.5 | 18   |                | ucugucccugguuuugcgcu       |
| nDs_002834843.1_5113                   | 1.5 | 21   |                | cgagggcuguccagaguucuuug    |
| nDs_002844434.1_4087                   | 1.5 | 258  |                | uuccgccgucgaucguagaug      |
| nDs_002838169.1_4671                   | 1.5 | 47   |                | accuuuugggucucuguccucu     |
| nDs_002567550.1_38944                  | 1.5 | 97   |                | uuugcaccgucgucguagaug      |
| nDs_002639690.1_29492                  | 1.5 | 2928 |                | guuguaccagucgucgauguc      |
| nDs_002530398.1_43703                  | 1.4 | 31   |                | cagggccuaaaugacauuuacacu   |
| nDs_002829616.1_5794                   | 1.4 | 15   |                | acggcuggcgucucgucgacc      |
| NW_002626049.1_30948<br>isc-miR-981-3p | 1.4 | 4936 | dme-miR-981-3p | uucguugucguagaaaccugau     |

|                                         |     |     |                 |                        |
|-----------------------------------------|-----|-----|-----------------|------------------------|
| nDs_002790353.1_10903                   | 1.4 | 20  |                 | cacgucacagcguccgcucaag |
| nDs_002721909.1_19415                   | 1.4 | 312 |                 | caugacugucaucuuugcaucu |
| nDs_002592028.1_35707                   | 1.4 | 26  |                 | cucgaggucuaacccgucuccu |
| nDs_002697784.1_22512                   | 1.4 | 121 |                 | uuggacuuugagcauggcgagg |
| nDs_002515625.1_45241                   | 1.3 | 24  |                 | augccacugucccaguuucugc |
| nDs_002815935.1_7502                    | 1.3 | 15  |                 | ucugcgagacgcucaacgacag |
| nDs_002650258.1_28243                   | 1.2 | 23  |                 | cucaagauucuccgagucgc   |
| nDs_002663292.1_26641                   | 1.2 | 137 |                 | acugugauugaacugaacgaca |
| nDs_002744911.1_16577                   | 1.2 | 11  |                 | auucggacaucgcaggagcug  |
| nDs_002827450.1_6124                    | 1.2 | 20  |                 | cacgucacagcguccgcucaag |
| nDs_002545470.1_41625                   | 1.2 | 11  |                 | auucggacaucgcaggagcug  |
| nDs_002553320.1_40622                   | 1.2 | 11  |                 | auucggacaucgcaggagcug  |
| nDs_002598280.1_35014                   | 1.1 | 28  |                 | ucaacuccuacgucggugcug  |
| nDs_002756375.1_14945                   | 1.1 | 52  |                 | uucacgaaucugaacgggaca  |
| nDs_002613137.1_32572                   | 1.1 | 19  |                 | ugugaaggccuccugucucu   |
| nDs_002563762.1_39378                   | 1   | 18  |                 | aagaauaaacaagguacggau  |
| nDs_002768943.1_13309                   | 0.9 | 121 |                 | ugacgucaucguagugcugcu  |
| nDs_002546088.1_41480                   | 0.8 | 18  |                 | aucuuuugacacguuggaucu  |
| nDs_002856883.1_2662                    | 0.8 | 38  |                 | ugugagauuguuugcauagcg  |
| nDs_002615653.1_32278                   | 0.8 | 257 |                 | uuccgccgucgucguagaug   |
| nDs_002655152.1_27700                   | 0.8 | 321 |                 | ugaaagcagauaccaugacugu |
| nDs_002808312.1_8698                    | 0.6 | 59  |                 | uuguggacgccugacaagccu  |
| nDs_002784518.1_11647                   | 0.5 | 26  |                 | aucuuuugacacguuggaucu  |
| nDs_002860612.1_1764                    | 0.4 | 11  |                 | aacaugagcgacgucguaccg  |
| NW_002847019.1_3755<br>isc-miR-1000-3p  | 0.3 | 49  | dme-miR-1000-3p | augcuggggacacugaaaucc  |
| nDs_002585048.1_36632                   | 0.3 | 9   |                 | cuucguagucggauuauga    |
| nDs_002569020.1_38698                   | 0.2 | 353 |                 | gccggaacagucaucguugcug |
| nDs_002820844.1_6987                    | 0.2 | 39  |                 | auucggcgccacuuugaacgaa |
| NW_002573167.1_38165<br>isc-miR-2494-3p | 0   | 79  | dme-miR-2494-3p | uucccaguaguccaggaccug  |

**Table S1.** B. mature miRNAs of *Ixodes scapularis* (already available in miRBase) detected in miRDeep2 analysis.

| tag id               | miRDeep2 score | mature read count | mature miRBase miRNA | consensus mature sequence |
|----------------------|----------------|-------------------|----------------------|---------------------------|
| NW_002860020.1_1824  | 6.60E+05       | 1296028           | isc-miR-375          | uuuguucguucggcucgaguuu    |
| NW_002784743.1_11596 | 3.90E+05       | 773543            | isc-miR-10           | uaccugugagauccgaauuugu    |
| NW_002651209.1_28145 | 3.60E+05       | 706969            | isc-miR-2001         | uugugaccguuacaauugggcaug  |
| NW_002835324.1_5031  | 1.80E+05       | 356093            | isc-miR-12           | ugagauuuacauaggguacuggu   |
| NW_002509761.1_45916 | 1.60E+05       | 327576            | isc-bantam           | ugagaucauuuguaaagcugauu   |
| NW_002505804.1_46394 | 1.60E+05       | 327576            | isc-bantam           | ugagaucauuuguaaagcugauu   |
| NW_002871802.1_369   | 4.90E+04       | 96352             | isc-miR-100          | aaccgugagauccgaacuugug    |
| NW_002656291.1_27550 | 4.10E+04       | 81041             | isc-miR-3931         | uacuuugagucgguaacgaauccu  |
| NW_002648701.1_28526 | 3.60E+04       | 70402             | isc-miR-8            | uaauacugucagguaaagauugc   |
| NW_002835324.1_5033  | 3.40E+04       | 66800             | isc-miR-5307         | uaauucuuuuugguaucucuggg   |
| NW_002778756.1_12266 | 2.80E+04       | 54755             | isc-miR-79           | ucuuugguuauucuaugcugaua   |
| NW_002527183.1_43986 | 2.20E+04       | 43978             | isc-miR-263a         | aauggcacuggaagaauucacgg   |
| NW_002527216.1_43977 | 2.20E+04       | 42981             | isc-miR-279          | ugacuagauccacacucaucca    |
| NW_002741283.1_17066 | 1.50E+04       | 29423             | isc-miR-276          | uaggaacuucuaaccaugcucg    |
| NW_002822737.1_6809  | 1.40E+04       | 25686             | isc-miR-87           | gugcccggaacuugucucagccu   |
| NW_002697059.1_22632 | 1.30E+04       | 25752             | isc-miR-184          | uggacggagaacugauaagggc    |
| NW_002784743.1_11606 | 9.80E+03       | 19228             | isc-miR-317          | ugaacacagcuggugguauaucagu |
| NW_002838206.1_4665  | 8.70E+03       | 16890             | isc-miR-305          | auuguacuucacaggugcucugga  |

|                      |          |       |              |                           |
|----------------------|----------|-------|--------------|---------------------------|
| NW_002692816.1_23154 | 6.90E+03 | 13241 | isc-miR-2b   | uaucaacagccaccuuugaugagcu |
| NW_002692816.1_23150 | 5.60E+03 | 10571 | isc-miR-2a   | uaucaacagccagcuuugaugagc  |
| NW_002692816.1_23156 | 5.50E+03 | 7193  | isc-miR-71   | ucucacuaaccuugucuuuguug   |
| NW_002804504.1_9143  | 4.60E+03 | 5941  | isc-miR-307  | ccucacucaguuuggcugugug    |
| NW_002535453.1_43180 | 3.00E+03 | 5915  | isc-miR-153  | uugcauagucacaaaagugaug    |
| NW_002764570.1_13794 | 2.80E+03 | 5474  | isc-miR-252b | uuuaguuagugccgcagguaa     |
| NW_002604667.1_33926 | 2.80E+03 | 5463  | isc-miR-315  | uuuaguuagugcucagaaggcg    |
| NW_002704625.1_21791 | 1.80E+03 | 3647  | isc-miR-1    | uggaauuuuaagaaguaggag     |
| NW_002734393.1_17986 | 1.00E+03 | 1901  | isc-miR-278  | ccggaugaaauucuccuggcc     |
| NW_002848014.1_3640  | 6.90E+02 | 1368  | isc-miR-5314 | uauagaugaugucuucaugaug    |
| NW_002627241.1_30834 | 6.60E+02 | 1302  | isc-miR-5315 | aacacaaacuccggacaagcac    |
| NW_002527183.1_43990 | 3.70E+02 | 575   | isc-miR-96   | uuuggcacuaagcacuuuuugu    |
| NW_002522955.1_44449 | 3.10E+02 | 434   | isc-miR-7    | uggaagacuaguuuuuguuguu    |
| NW_002784743.1_11634 | 2.10E+02 | 330   | isc-miR-993  | gaagcucguuuuacagguaucu    |
| NW_002805128.1_9069  | 1.00E+02 | 90    | isc-miR-5308 | ucugugcugaggaguuauau      |
| NW_002589297.1_36170 | 9.40E+01 | 76    | isc-miR-5305 | uaaguuauucuccaagcccau     |
| NW_002733905.1_18011 | 5.3      | 272   | isc-miR-124  | uaaggcacgcggugaaugcc      |
| NW_002506863.1_46298 | 5.3      | 1270  | isc-miR-133  | uuggucccuuacaccagugu      |
| NW_002542293.1_42026 | 2.1      | 147   | isc-miR-5310 | uguagucuggcagaaacguc      |
| NW_002610401.1_33095 | 2        | 69    | isc-miR-5306 | agaguaucacgugacgucucu     |
| NW_002755260.1_15039 | 2        | 28    | isc-miR-1993 | cauuuagcuaguuucgcgggg     |
| NW_002796881.1_10053 | 1.9      | 28    | isc-miR-1993 | cauuuagcuaguuucgcgggg     |
| NW_002638804.1_29568 | 1.8      | 693   | isc-miR-5309 | caaucccauggaaccgccgaa     |
| NW_002793850.1_10420 | 1.7      | 743   | isc-miR-5312 | uggcugaacguuuuauucgu      |
| NW_002838206.1_4667  | 1.2      | 17097 | isc-miR-275  | ucagguaccugaaguagcgcg     |
| NW_002784743.1_11605 | 1.1      | 19228 | isc-miR-317  | ugaacacagcuggguauuacagu   |
| NW_002822737.1_6807  | -0.8     | 3011  | isc-miR-87   | gugagcaaguuucaggugugu     |
| NW_002796881.1_10054 | -2.2     | 28    | isc-miR-1993 | cauuuagcuaguuucgcgggg     |
| NW_002741199.1_17073 | -5.1     | 12    | isc-miR-137  | uuauugcuugagaauacacgu     |

Table S2. KEGG pathways targeted by differentially expressed miRNAs.

| Target proteins | KEGG ID     | KEGG pathways                                                                                          |
|-----------------|-------------|--------------------------------------------------------------------------------------------------------|
| EEC07251.1      | KEGG:R02541 | RAS-related protein, putative, Sphingolipid metabolism pathway                                         |
| EEC06395.1      | KEGG:R04030 | Ubiquinone and other terpenoid-quinone biosynthesis,                                                   |
|                 |             | Metabolic pathways                                                                                     |
|                 |             | Biosynthesis of secondary metabolites                                                                  |
|                 |             | Biosynthesis of cofactors                                                                              |
| EEC17038.1      | KEGG:R02541 |                                                                                                        |
| EEC08267.1      | KEGG:R00253 | Arginine biosynthesis                                                                                  |
|                 |             | Alanine, aspartate and glutamate metabolism                                                            |
|                 |             | Glyoxylate and dicarboxylate metabolism                                                                |
|                 |             | Nitrogen metabolism                                                                                    |
|                 |             | Metabolic pathways                                                                                     |
|                 |             | Microbial metabolism in diverse environments                                                           |
|                 |             | Biosynthesis of amino acids                                                                            |
| EEC06395.1      | KEGG:R04030 | Fatty-acyl-CoA Synthase (Fatty acid biosynthesis pathway)                                              |
| EEC17038.1      | KEGG:R02541 | RAB-33, putative [Ixodes scapularis], exosome biogenesis and secretion between arthropods and mammals. |
| EEC08267.1      | KEGG:R00253 |                                                                                                        |
| EEC10220.1      | KEGG:R04188 | 4-aminobutyrate aminotransferase, Valine, leucine and isoleucine degradation                           |
| EEC02614.1      | KEGG:R01178 | medium-chain acyl-CoA dehydrogenase, putative, Lipid transport and metabolism                          |
| EEC07988.1      | KEGG:R05982 | alpha-mannosidase putative, Protein processing in endoplasmic reticulum, Various                       |
|                 | KEGG:R06722 | types of N-glycan biosynthesis                                                                         |

|            |             |                                                                                                                                                                                                                                 |
|------------|-------------|---------------------------------------------------------------------------------------------------------------------------------------------------------------------------------------------------------------------------------|
| EEC02307.1 | KEGG:R01178 | medium-chain acyl-CoA dehydrogenase, putative,                                                                                                                                                                                  |
| EEC07756.1 | KEGG:R03876 | ubiquitin protein ligase, putative,                                                                                                                                                                                             |
| EEC20239.1 | KEGG:R03532 | thioredoxin-dependent peroxide reductase, which confer a protective role in cells through its peroxidase activity by reducing hydrogen peroxide                                                                                 |
| EEC04717.1 | KEGG:R03876 | RNA polymerase II transcription elongation factor, putative,                                                                                                                                                                    |
| EEC17038.1 | KEGG:R02541 | RAB-33, putative [Ixodes scapularis], exosome biogenesis and secretion between arthropods and mammals.                                                                                                                          |
| EEC09178.1 | KEGG:R07364 | acireductone dioxygenase, putative, Cysteine and methionine metabolism                                                                                                                                                          |
| EEC17038.1 | KEGG:R02541 | RAB-33, putative [Ixodes scapularis], exosome biogenesis and secretion between arthropods and mammals.                                                                                                                          |
| EEC08267.1 | KEGG:R00253 | glutamine synthetase, putative,                                                                                                                                                                                                 |
| EEC09478.1 | KEGG:R02324 | nicotinamide riboside kinase, putative, Nicotinate and nicotinamide metabolism                                                                                                                                                  |
| EEC06118.1 | KEGG:R02530 | 4-hydroxyphenylpyruvate dioxygenase, putative, Pyruvate metabolism                                                                                                                                                              |
| EEC07756.1 | KEGG:R03876 | ubiquitin protein ligase, putative,                                                                                                                                                                                             |
| EEC07147.1 | KEGG:R05330 | short-chain dehydrogenase, putative, Primary bile acid biosynthesis, Biosynthesis of unsaturated fatty acids                                                                                                                    |
| EEC11438.1 | KEGG:R02541 | RAS-related protein, putative, exosome biogenesis and secretion between arthropods and mammals                                                                                                                                  |
| EEC08160.1 | KEGG:R02541 | GTP-binding protein Rhes, putative, exosome biogenesis and secretion between arthropods and mammals.                                                                                                                            |
| EEC10220.1 | KEGG:R04188 | 4-aminobutyrate aminotransferase, Valine, leucine and isoleucine degradation                                                                                                                                                    |
| EEC07981.1 | KEGG:R01049 | ribose-phosphate pyrophosphokinase 1 putative,                                                                                                                                                                                  |
|            |             | rn00030 Pentose phosphate pathway                                                                                                                                                                                               |
|            |             | rn00230 Purine metabolism                                                                                                                                                                                                       |
|            |             | rn01100 Metabolic pathways                                                                                                                                                                                                      |
|            |             | rn01110 Biosynthesis of secondary metabolites                                                                                                                                                                                   |
|            |             | rn01120 Microbial metabolism in diverse environments                                                                                                                                                                            |
|            |             | rn01200 Carbon metabolism                                                                                                                                                                                                       |
|            |             | rn01230 Biosynthesis of amino acids                                                                                                                                                                                             |
| EEC08267.1 | KEGG:R00253 | glutamine synthetase putative, Arginine biosynthesis, Alanine, aspartate and glutamate metabolism, Glyoxylate and dicarboxylate, nitrogen metabolism, Microbial metabolism in diverse environments, Biosynthesis of amino acids |
| EEC05869.1 | KEGG:R02268 | cytochrome P450 putative, Arachidonic acid metabolism                                                                                                                                                                           |
| EEC04717.1 | KEGG:R03876 | RNA polymerase II transcription elongation factor, putative                                                                                                                                                                     |
| EEC08267.1 | KEGG:R00253 | glutamine synthetase putative, Arginine biosynthesis, Alanine, aspartate and glutamate metabolism, Glyoxylate and dicarboxylate, nitrogen metabolism, Microbial metabolism in diverse environments, Biosynthesis of amino acids |
| EEC07251.1 | KEGG:R02541 | RAS-related protein putative, exosome biogenesis and secretion between arthropods and mammals                                                                                                                                   |
| EEC17749.1 | KEGG:R02541 | RAB-9 and, exosome biogenesis and secretion between arthropods and mammals                                                                                                                                                      |
| EEC09478.1 | KEGG:R02324 | nicotinamide riboside kinase (putative), Nicotinate and nicotinamide metabolism                                                                                                                                                 |
| EEC05808.1 | KEGG:R03876 |                                                                                                                                                                                                                                 |
| EEC02290.1 | KEGG:R00004 | secreted inorganic pyrophosphatase, putative,                                                                                                                                                                                   |
| EEC15523.1 | KEGG:R02265 | Microsomal prostaglandin E synthase 2, Arachidonic acid metabolism                                                                                                                                                              |
| EEC08267.1 | KEGG:R00253 | glutamine synthetase putative, Arginine biosynthesis, Alanine, aspartate and glutamate metabolism, Glyoxylate and dicarboxylate, nitrogen metabolism, Microbial metabolism in diverse environments, Biosynthesis of amino acids |
| EEC10220.1 | KEGG:R04188 | (S)-3-amino-2-methylpropionate transaminase, Valine, leucine and isoleucine degradation                                                                                                                                         |
| EEC01042.1 | KEGG:R00310 | Ferrochelatase, Porphyrin and chlorophyll metabolism, Biosynthesis of secondary metabolites, Heme biosynthesis                                                                                                                  |

**Table S3.** Gene-specific PCR and qRT-PCR primers used in this study.

| Gene               | GenBank ID         | Forward Primer (5'-3')   | Reverse Primer (5'-3')  | Size (bp) |
|--------------------|--------------------|--------------------------|-------------------------|-----------|
| <i>RPS4 (qPCR)</i> | DQ066214.1         | GGTGAAGAAGATTGTCAAGCAGAG | TGAAGCCAGCAGGGTAGTTTG   | 80        |
| <i>flaB (qPCR)</i> | Stone et al., 2015 | GGG TCT CAA GCG TCT TGG  | GAA CCG GTG CAG CCT GAG | 139       |
